# Supplementary material
Source: PubMed Central journal article supplement (PMC4467169)

# Supplemental Figure 1

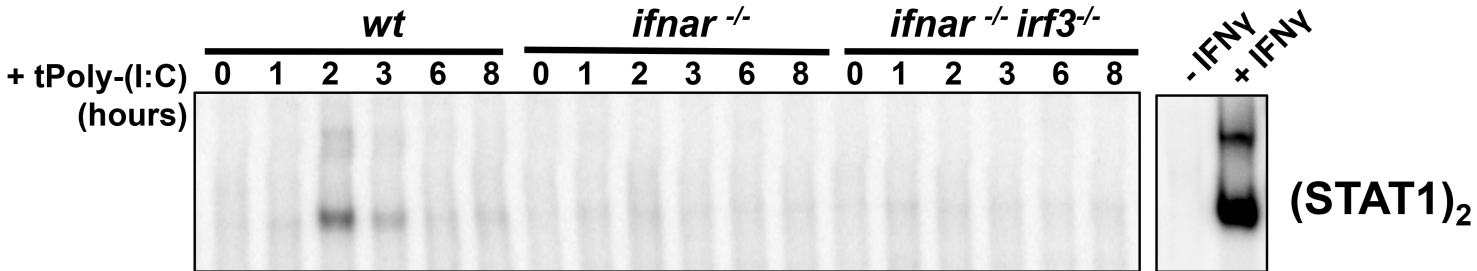

Supplement: supp_jlb.4A1014-483RR_Supplemental_Figure1.pdf [file supp_jlb.4A1014-483RR_Supplemental_Figure1.pdf]

# Supplemental Figure 2

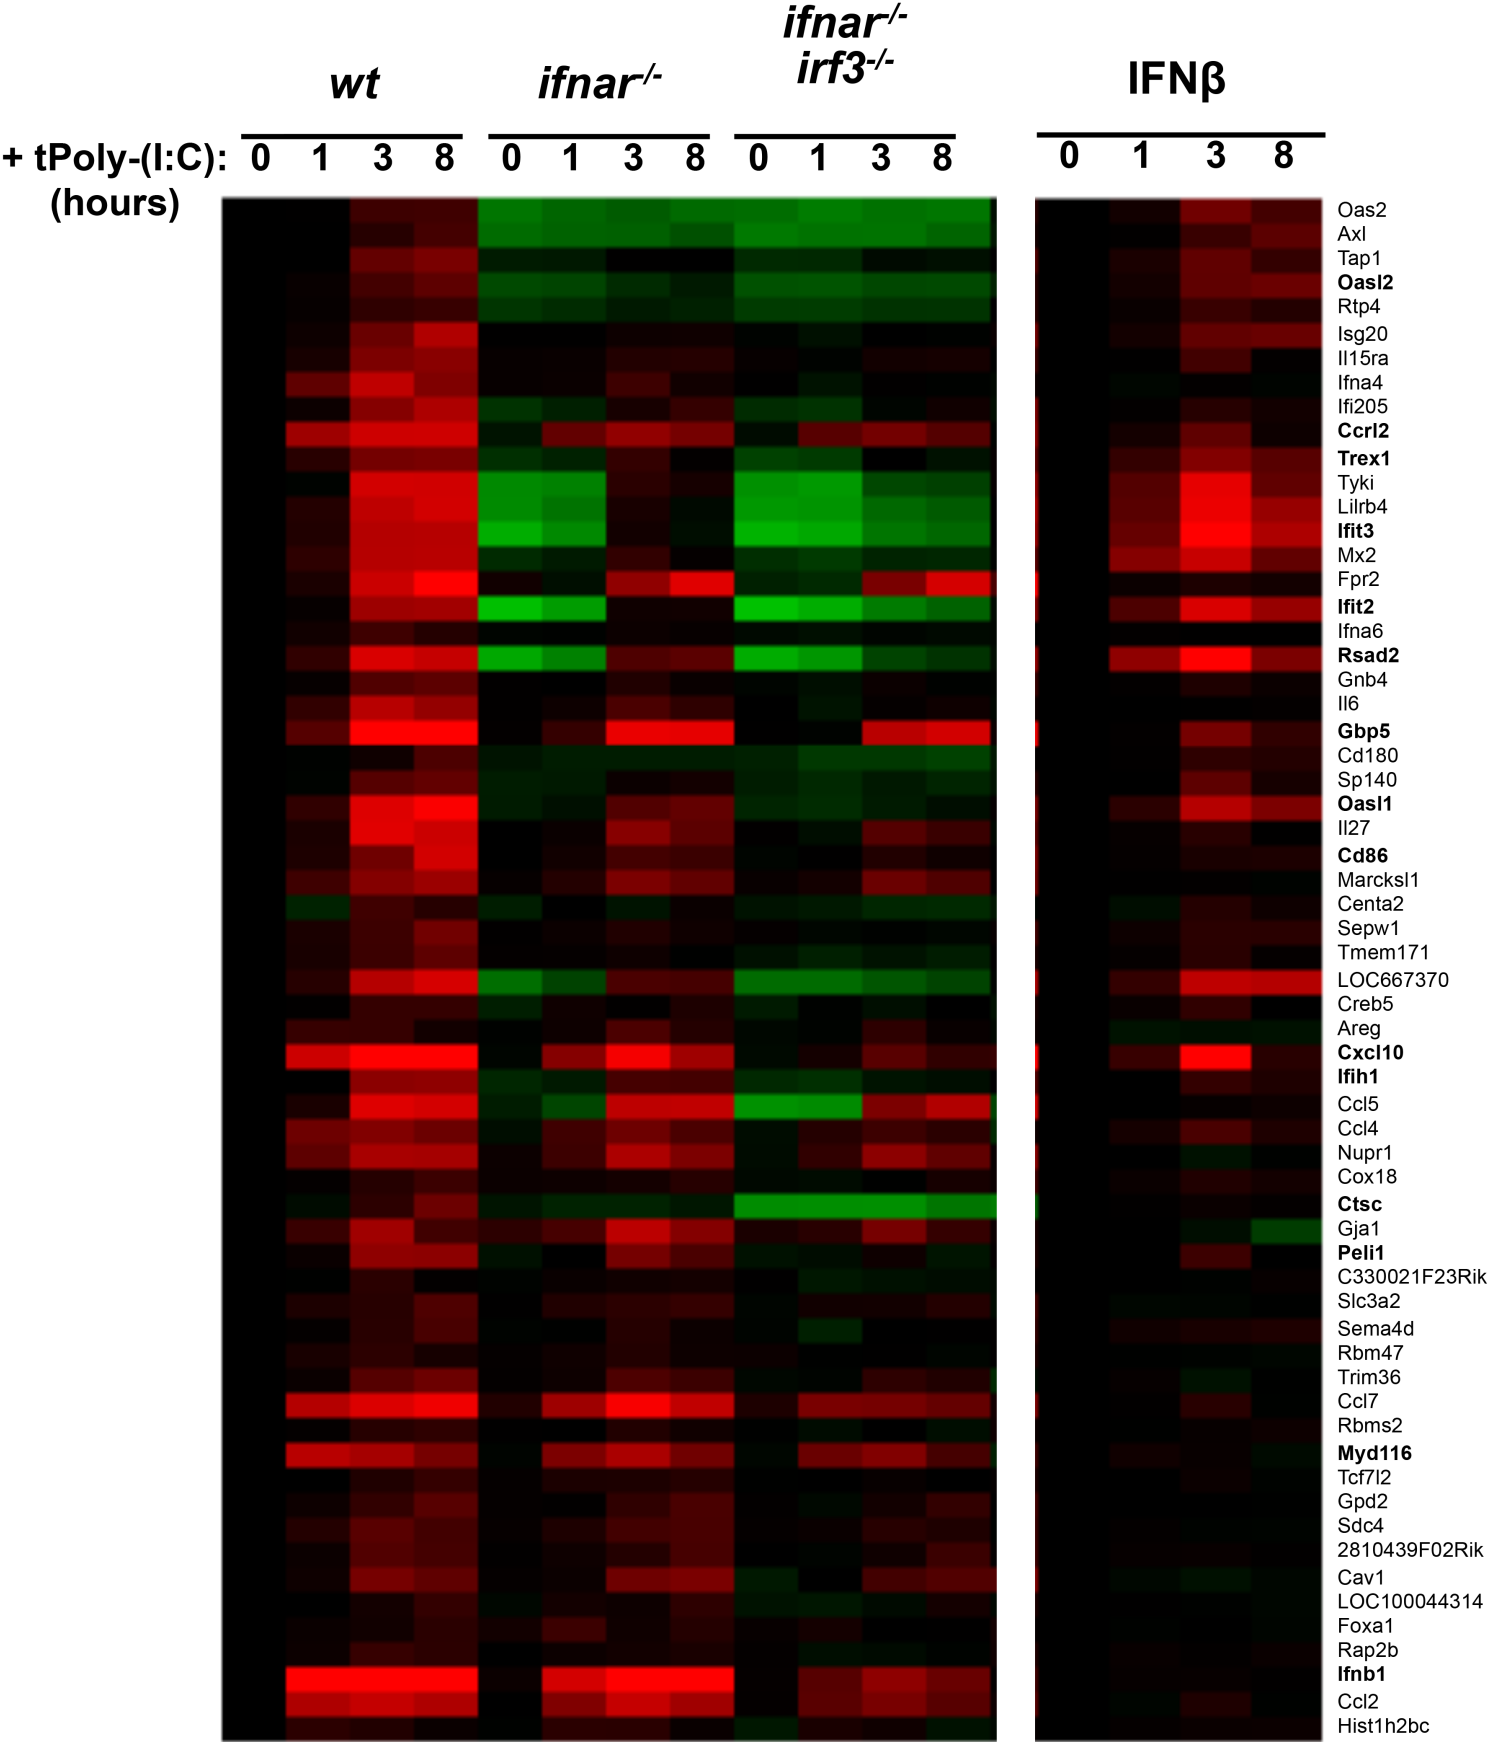

Supplement: supp_jlb.4A1014-483RR_Supplemental_Figure2.pdf [file supp_jlb.4A1014-483RR_Supplemental_Figure2.pdf]
